# Supplementary material for: Encapsulating CoS2–CoSe2 heterostructured nanocrystals in N-doped carbon nanocubes as highly efficient counter electrodes for dye-sensitized solar cells
Source: Royal Society of Chemistry journal article supplement (doi:10.1039/c8dt00067k), 2018-01-01
Supplement: c8dt00067k1.pdf [file c8dt00067k1.pdf]

## Supporting Information

### **Encapsulating CoS<sub>2</sub>-CoSe<sub>2</sub> heterostructured nanocrystals in N-doped carbon nanocubes as highly efficient counter electrode for dye-sensitized solar cells**

Shoushuang Huang, <sup>a</sup> Haitao Wang, <sup>a</sup> Shangdai Wang, <sup>a</sup> Zhangjun Hu, <sup>a</sup> Ling Zhou, <sup>b</sup>  
Zhiwen Chen, <sup>\*a</sup> Yong Jiang, <sup>a</sup> and Xuefeng Qian <sup>\*b</sup>

[a] Dr. S. S. Huang, Dr. Z. J. Hu, Dr. Y. Jiang, Prof. Z. W. Chen

School of Environmental and Chemical Engineering, Shanghai University, Shanghai  
200444, China;

[b] Prof. X. F. Qian

Shanghai Electrochemical Energy Devices Research Center, School of Chemistry and  
Chemical Engineering and State Key Laboratory of Metal Matrix Composites,  
Shanghai Jiao Tong University, Shanghai, 200240, P. R. China.

E-mail: xfqian@sjtu.edu.cn;

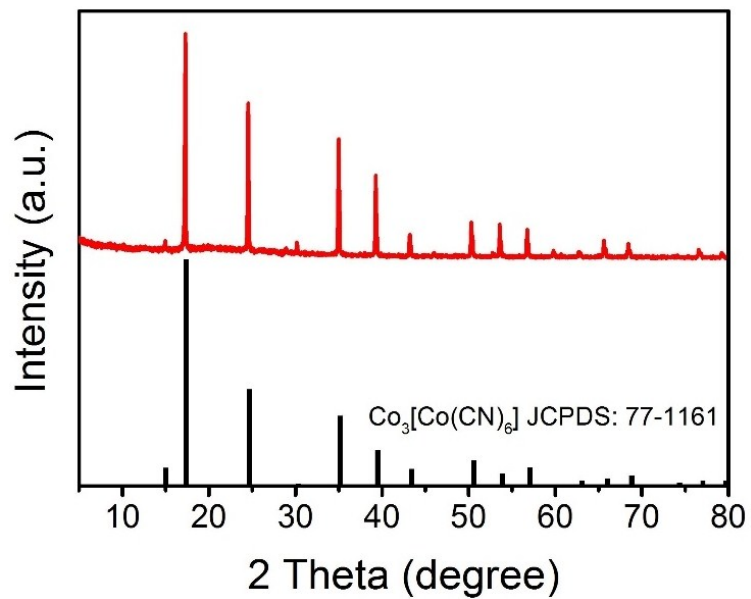

Fig. S1 XRD pattern of the as-synthesized  $\text{Co}_3[\text{Co}(\text{CN})_6]_2$  PBA nanocubes.

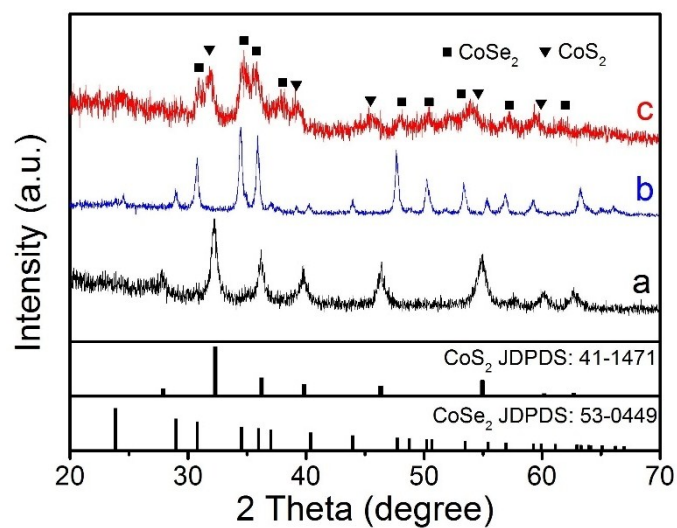

Fig. S2 XRD pattern of the as-prepared  $\text{CoS}_2@NC$  (a),  $\text{CoSe}_2@NC$  (b) and  $\text{CoS}_2\text{-CoSe}_2@NC$  (c) nanocubes.

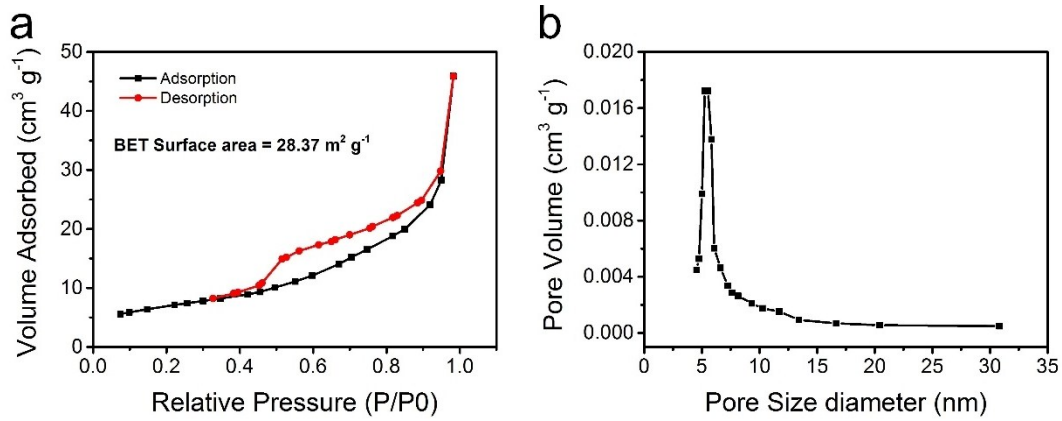

Fig. S3 Nitrogen adsorption/desorption isotherms (a) and pore size distribution of mesoporous CoS<sub>2</sub>-CoSe<sub>2</sub>@NC nanocubes (b).

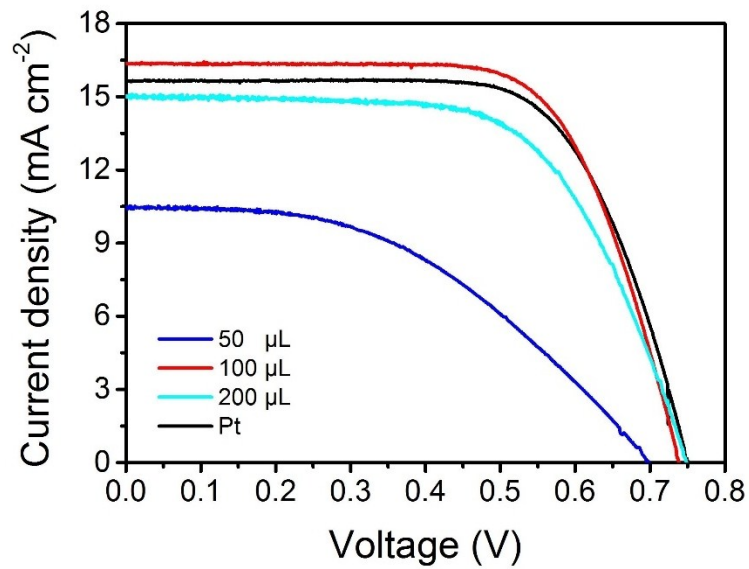

Fig. S4 J-V curve of DSSCs with different thickness of CoS<sub>2</sub>-CoSe<sub>2</sub>@NC and Pt CEs.

Tab. S1 Photovoltaic performance of DSSCs with different thickness of CoS<sub>2</sub>-CoSe<sub>2</sub>@NC and Pt CEs.

| CEs    | V <sub>oc</sub><br>[mV] | J <sub>sc</sub><br>[mA/cm <sup>2</sup> ] | FF          | η<br>[%]    |
|--------|-------------------------|------------------------------------------|-------------|-------------|
| 50 μL  | 0.697 ± 0.006           | 10.42 ± 0.15                             | 0.49 ± 0.02 | 3.56 ± 0.14 |
| 100 μL | 0.740 ± 0.005           | 16.35 ± 0.11                             | 0.70 ± 0.01 | 8.45 ± 0.06 |
| 200 μL | 0.748 ± 0.013           | 15.03 ± 0.10                             | 0.64 ± 0.01 | 7.19 ± 0.11 |
| Pt     | 0.749 ± 0.003           | 15.53 ± 0.12                             | 0.69 ± 0.00 | 8.07 ± 0.07 |

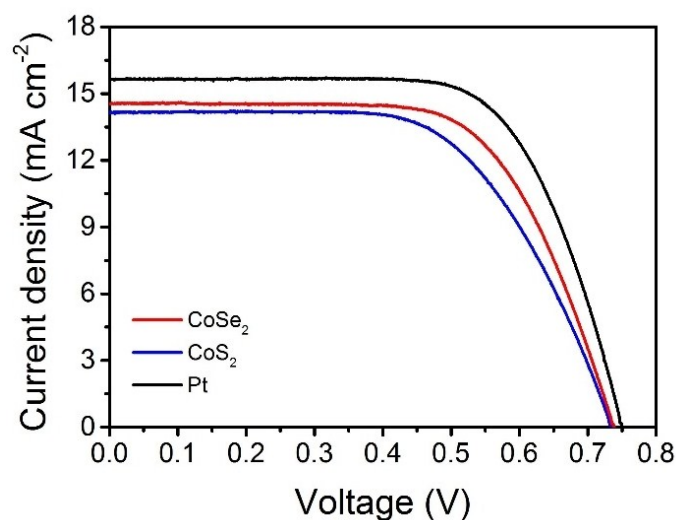

Fig. S5 J-V curves of the DSSCs with CoSe<sub>2</sub>, CoS<sub>2</sub> and Pt CEs, measured under AM1.5G illumination (100 mW cm<sup>-2</sup>).

Tab. S2 Photovoltaic performances of DSSCs with CoS<sub>2</sub>, CoSe<sub>2</sub> and Pt CEs under AM1.5G illumination.

| CEs               | V <sub>oc</sub><br>[V] | J <sub>sc</sub><br>[mA/cm <sup>2</sup> ] | FF          | η<br>[%]    |
|-------------------|------------------------|------------------------------------------|-------------|-------------|
| CoSe <sub>2</sub> | 0.736 ± 0.007          | 14.52 ± 0.15                             | 0.65 ± 0.00 | 6.95 ± 0.13 |
| CoS <sub>2</sub>  | 0.732 ± 0.008          | 14.17 ± 0.09                             | 0.63 ± 0.01 | 6.54 ± 0.08 |
| Pt                | 0.749 ± 0.003          | 15.53 ± 0.12                             | 0.69 ± 0.00 | 8.07 ± 0.07 |

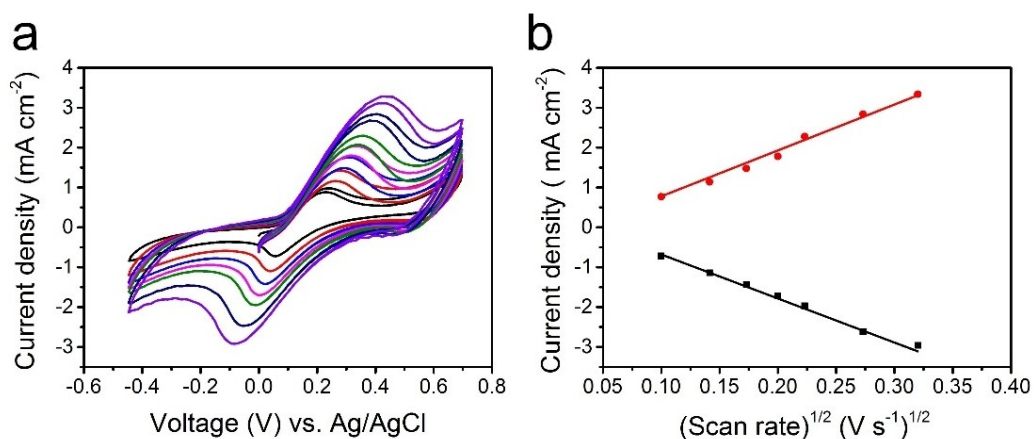

Fig. S6 (a) CV curves of the CoS<sub>2</sub>-CoSe<sub>2</sub>@NC nanocubes CE at different scan rate; (b) relationship between the peak current density and the square root of scanning rate of CoS<sub>2</sub>-CoSe<sub>2</sub>@NC nanocubes CEs.

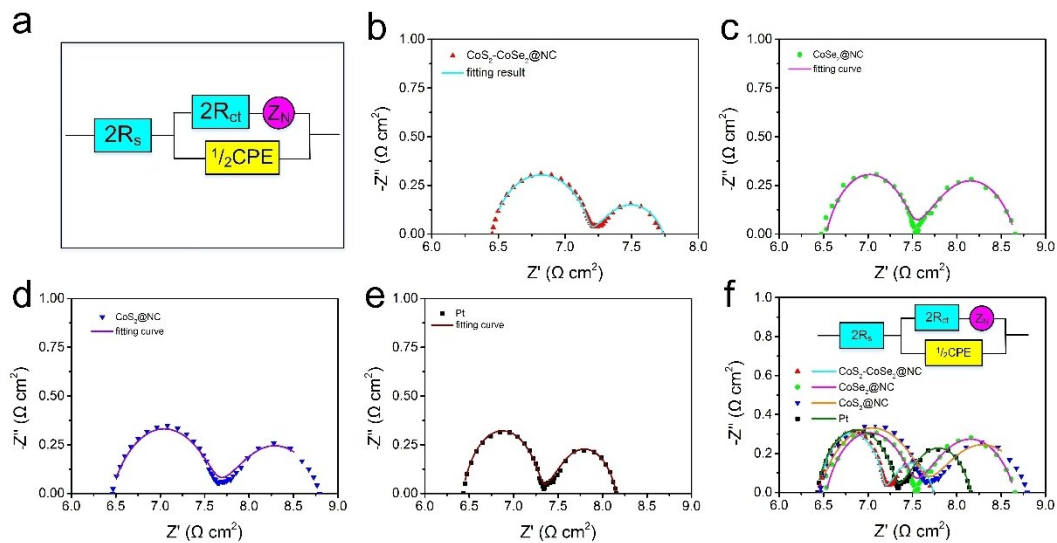

Fig. S7 The equivalent circuit diagram used to fit the impedance spectra in the symmetrical cells (a) and the fitting curves of  $\text{CoS}_2\text{-CoSe}_2\text{@NC}$  (a),  $\text{CoSe}_2\text{@NC}$  (b),  $\text{CoS}_2\text{@NC}$  (c) and Pt (d) CEs.

Tab. S3 Fitted electrochemical parameters from EIS.

| CE                                     | $R_s$<br>$\Omega \text{ cm}^2$ | $R_{ct}$<br>$\Omega \text{ cm}^2$ | CPE-T<br>$\mu\text{F cm}^{-2}$ | CPE-P | $W_s\text{-R}$<br>$\Omega \text{ cm}^2$ | $W_s\text{-T}$ | $W_s\text{-P}$ |
|----------------------------------------|--------------------------------|-----------------------------------|--------------------------------|-------|-----------------------------------------|----------------|----------------|
| $\text{CoS}_2\text{-CoSe}_2\text{@NC}$ | 3.23                           | 0.38                              | 269.16                         | 0.84  | 0.54                                    | 0.35           | 0.50           |
| $\text{CoSe}_2\text{@NC}$              | 3.26                           | 0.51                              | 220.52                         | 0.83  | 1.10                                    | 0.68           | 0.50           |
| $\text{CoS}_2\text{@NC}$               | 3.23                           | 0.59                              | 217.94                         | 0.86  | 1.18                                    | 0.54           | 0.50           |
| Pt                                     | 3.20                           | 0.45                              | 112.62                         | 0.95  | 0.83                                    | 0.42           | 0.50           |

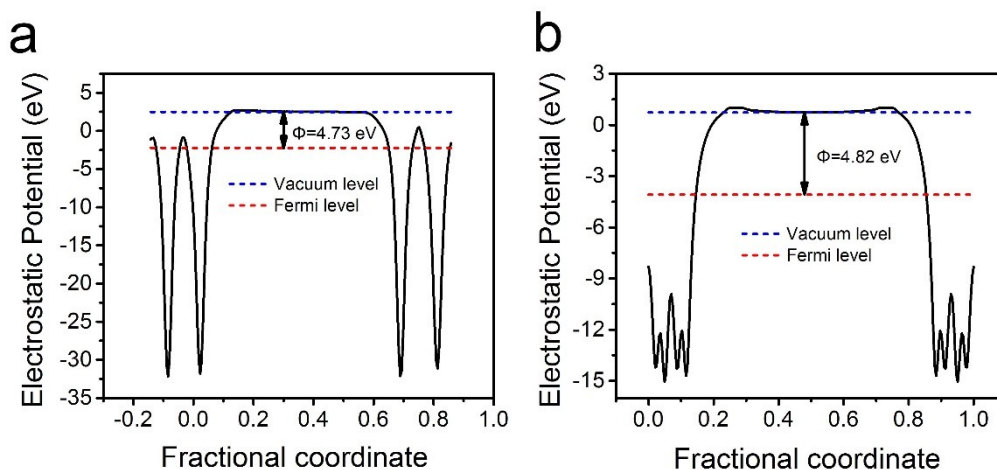

Fig. S8 Average potential profile along X-axis of (a) CoS<sub>2</sub> (001) and (b) CoSe<sub>2</sub> (100). The insert shows the calculated work function.

All of the density functional calculations were performed using the plane-wave pseudopotential method, implemented with the Cambridge Sequential Total Energy Package (CASTEP) code. The local density approximation (LDA) was used to describe the exchange-correlation effects. In order to obtain the work functions of CoS<sub>2</sub> and CoSe<sub>2</sub>, two slab modules were created for the calculation. Both of the slabs consisted of a 30 Å vacuum layer and the surface cleaved for bulk material.<sup>1-4</sup> The atoms in the surface layer were fixed, while all other atoms were fully relaxed with force criteria of 0.025 eV/Å.

1. J. W. Wan, G. J. Fang, H. J. Yin, X. F. Liu, D. Liu, M. T. Zhao, W. J. Ke, H. Tao and Z. Y. Tang, *Adv. Mater.*, 2014, **26**, 8101-8106.
2. Z. X. Qin, Y. B. Chen, Z. X. Huang, J. Z. Su, Z. D. Diao and L. J. Guo, *J. Phys. Chem. C*, 2016, **120**, 14581-14589.
3. J. L. Zheng, W. Zhou, Y. R. Ma, W. Cao, C. B. Wang and L. Guo, *Chem. Commun.*, 2015, **51**, 12863-12866.
4. X. W. Wang, Y. Xie, B. Bateer, K. Pan, Y. T. Zhou, Y. Zhang, G. F. Wang, W. Zhou and H. G. Fu, *Nano Research*, 2016, **9**, 2862-2874.
